# Supplementary material for: Large-scale neuroanatomy using LASSO: Loop-based Automated Serial Sectioning Operation
Source: PubMed Central journal article supplement (PMC6198950; doi:10.1371/journal.pone.0206172), 2018-10-23
Supplement: pone.0206172.s001.pdf [file pone.0206172.s001.pdf]

| STEP # | PROCESS DESCRIPTION                                                                                                                                                                                                                                                                                                                                                                                                                                                                                                                                                                                                           | CHECK-OFF |
|--------|-------------------------------------------------------------------------------------------------------------------------------------------------------------------------------------------------------------------------------------------------------------------------------------------------------------------------------------------------------------------------------------------------------------------------------------------------------------------------------------------------------------------------------------------------------------------------------------------------------------------------------|-----------|
| 0010   | <p><b>OBTAIN SILICON WAFER WITH SiN</b></p> <p>POLISH: SSP<br/> DIAMETER: 4 INCH<br/> DOPANT: B<br/> TYPE: P<br/> ORIENTATION: &lt;100&gt;<br/> THICKNESS: 500 μm<br/> GRADE: PRIME</p> <p>SiN SPECIFICATIONS:</p> <p>THICKNESS: 100 nm<br/> TYPE: LOW-STRESS CVD</p> <p>VENDOR: UNIVERSITYWAFER.COM</p>                                                                                                                                                                                                                                                                                                                      |           |
| 0020   | <p><b>DEPOSIT HMDS LAYER</b></p> <p>EQUIPMENT: KARL SUSS RC8 SPINNER (MARCUS INORGANIC CLEANROOM)</p> <p>RECIPE: STEP 1: 3000 rpm<br/> 1000 rpm/s<br/> 10 s</p> <p>NOTES FOR KARL-SUSS RC8 SPINNER:</p> <ul style="list-style-type: none"> <li>• PRESS 'ENTER' TO CLEAR ERRORS</li> <li>• PRESS 'ST/STOP' TO CLEAR ERRORS UNTIL YOU SEE '0000'</li> <li>• 'DEVICES' SHOULD ALL BE 'READY'</li> <li>• RIGHT-CLICK TO RESET IF THERE ARE STILL ERRORS</li> <li>• IF YOU NEED TO, POWER CYCLE THE MACHINE</li> <li>• SELECT THE OPEN FOLDER ICON TO ADD A RECIPE</li> <li>• SELECT THE NEW PAGE ICON TO EDIT A RECIPE</li> </ul> |           |

|      |                                                                                                                                                                                                                                                                                                                                                                                                                                                                                                                                                                                                                                                                                                                                     |  |
|------|-------------------------------------------------------------------------------------------------------------------------------------------------------------------------------------------------------------------------------------------------------------------------------------------------------------------------------------------------------------------------------------------------------------------------------------------------------------------------------------------------------------------------------------------------------------------------------------------------------------------------------------------------------------------------------------------------------------------------------------|--|
|      | <ul style="list-style-type: none"> <li>• TO RUN YOUR RECIPE, USE THE DROP-DOWN MENU TO SELECT YOUR RECIPE, THEN SELECT RUN</li> <li>• BE SURE TO RUN THE AUTO-CLEAN RECIPE WITH THE CLEANROOM WAFER</li> <li>• FOR THE HOT-PLATE, DO NOT CHANGE 'CALIBRATION' OR 'PID' LOOPS VALUES</li> </ul>                                                                                                                                                                                                                                                                                                                                                                                                                                      |  |
| 0030 | <p><b>DEPOSIT PHOTORESIST</b></p> <p>PHOTORESIST:     SPR-220</p> <p>EQUIPMENT:       KARL SUSS RC8 SPINNER (MARCUS INORGANIC CLEANROOM)</p> <p>RECIPE:           STEP 1:     500 rpm<br/>                                                  100 rpm/s<br/>                                                  10 s</p> <p>                                                  STEP 2:     3000 rpm<br/>                                                  1000 rpm/s<br/>                                                  40 s</p> <p>                                                  STEP 3:     0 rpm<br/>                                                  500 rpm/s<br/>                                                  0 s</p> |  |
| 0040 | <p><b>BAKE PHOTORESIST</b></p> <p>EQUIPMENT:       KARL SUSS RC8 SPINNER (MARCUS INORGANIC CLEANROOM)</p> <p>RECIPE:           TEMPERATURE:   115 °C<br/>                                                  TIME:           60 seconds</p>                                                                                                                                                                                                                                                                                                                                                                                                                                                                                           |  |
| 0050 | <p><b>ALIGN MASK / EXPOSE PHOTORESIST</b></p> <p>EQUIPMENT:       KARL SUSS TSA MA-6 (MARCUS INORGANIC CLEANROOM)</p>                                                                                                                                                                                                                                                                                                                                                                                                                                                                                                                                                                                                               |  |

|      |                                                                                                                                                                                                                                                                                                                                                                                                                                                                                                                                                                                                                                                                                                                                                                                                                                                                                                                                                                                                                                                                                                |  |
|------|------------------------------------------------------------------------------------------------------------------------------------------------------------------------------------------------------------------------------------------------------------------------------------------------------------------------------------------------------------------------------------------------------------------------------------------------------------------------------------------------------------------------------------------------------------------------------------------------------------------------------------------------------------------------------------------------------------------------------------------------------------------------------------------------------------------------------------------------------------------------------------------------------------------------------------------------------------------------------------------------------------------------------------------------------------------------------------------------|--|
|      | <p>PARAMETERS:</p> <p>CONTACT TYPE:    HARD CONTACT<br/>ALIGNMENT GAP:   30 μm</p> <p>NOTES FOR KARL-SUSS TSA MA-6:</p> <ul style="list-style-type: none"><li>• BE SURE TO CHECK LAMP INTENSITY WITH UV SENSOR, IN BLACK CASE UNDERNEATH MACHINE</li><li>• BE SURE 365 nm WAVELENGTH IS SELECTED</li><li>• CH 1 IS 365 nm</li><li>• IF 'CHANGE MASK' SCREEN IS ON, PRESS 'CHANGE MASK' TO GO BACK TO MAIN SCREEN</li><li>• PLACE SENSOR ON CHUCK AND PRESS 'LAMP TEST' TO COMMENCE UV INTENSITY TEST</li><li>• FOR SPR-220, APPROXIMATELY 500 mJ/cm<sup>2</sup> IS REQUIRED</li><br/><li>• USE 'EDIT PARAMETER' BUTTON TO ADJUST EXPOSURE TIME AND THE ALIGNMENT GAP</li><li>• HARD CONTACT IS OK</li><li>• ONCE MASK IS ALIGNED, PRESS 'ALIGN CONT/EXP' TO BRING WAFER INTO CONTACT WITH MASK. IF ALIGNMENT IS NOT GOOD, PRESS 'ALIGN CONT/EXP' TO RELEASE MASK AND WAFER PROCEED WITH ALIGNMENT</li><li>• PRESS EXPOSE TO BEGIN EXPOSURE.</li><br/><li>• BE SURE TO REMOVE THE MASK, RETURN SUBSTRATE KNOBS TO X10 AND Y10, AND ROTATE CHUCK HOLDER SO THAT THE WHITE LINES MATCH.</li></ul> |  |
| 0060 | <p><b>DEVELOP PHOTORESIST</b></p> <p>DEVELOPER:        MF-319 for SPR-220 photoresist</p> <p>DEVELOP FOR 3 MINUTES, THEN PLACE WAFER IN WATER BATH FOR AT LEAST 3 MINUTES. AFTERWARDS, THOROUGHLY DRY THE WAFER.</p>                                                                                                                                                                                                                                                                                                                                                                                                                                                                                                                                                                                                                                                                                                                                                                                                                                                                           |  |

0070

## ETCH SILICON NITRIDE LAYER THRU TO SILICON

EQUIPMENT: OXFORD END-POINT RIE (MARCUS INORGANIC CLEANROOM)

NOTES FOR OXFORD END-POINT RIE:

- VISION RIE IS FINICKY. IT MIGHT BE FASTER, BUT IT IS INCONSISTENT. BEST TO USE OXFORD.
- SELECT THE 'SYSTEM' BUTTON
- PRESS 'STOP' TO BEGIN VENTING PROCESS
  - SELECT 'VENT' TO VENT CHAMBER
- WHEN TIME IS <100s, SWITCH 'CHAMBER DOWN' TO 'CHAMBER UP'
  - THEN PRESS BOTH GREEN BUTTONS SIMULTANEOUSLY TO OPEN CHAMBER
  - YOU WILL ALSO HEAR WHEN IT IS OK TO OPEN THE CHAMBER
- MAKE SURE O-RING IS SEATED EVENLY
- THERE ARE 2 PLATTENS: Al & Graphite
  - Al if etch depth is < 2  $\mu\text{m}$
  - Graphite if etch depth is > 2  $\mu\text{m}$
- SWITCH TO 'CHAMBER DOWN' AND PRESS BOTH GREEN BUTTONS SIMULTANEOUSLY TO LOWER LID
  - MAKE SURE LID IS ALIGNED CORRECTLY. MAY NEED TO ADJUST MANUALLY
- PRESS 'STOP', THEN 'EVACUATE'
  - BE SURE TO READ PROMPT CLOSELY. IT WILL TELL YOU TO PRESS 'CANCEL' IF YOU ARE EVACUATING AN EMPTY CHAMBER.
- TO SELECT YOUR PROCESS, GO SELECT THE PROCESS BUTTON
  - RECIPES -> LOAD -> OK
  
- **STANDARD OXIDE ETCH: (OK for etching 100 nm of SiN)**
  - **PRESSURE:** 50 mTorr
  - **O<sub>2</sub>:** 4
  - **CHF<sub>3</sub>:** 35
  - **RF power:** 250
  - **Step time:** 3 min
  
- AFTER DONE, SELECT CHAMBER CLEAN
  - MAKE SURE Al PLATTEN IS IN CHAMBER

|      |                                                                                                                                                                                                                                                                                                                                                                                                                                                                                                                                                                                                                                                                                                                                                                                                                                                                                                                                                                                                                                                                                                                      |  |
|------|----------------------------------------------------------------------------------------------------------------------------------------------------------------------------------------------------------------------------------------------------------------------------------------------------------------------------------------------------------------------------------------------------------------------------------------------------------------------------------------------------------------------------------------------------------------------------------------------------------------------------------------------------------------------------------------------------------------------------------------------------------------------------------------------------------------------------------------------------------------------------------------------------------------------------------------------------------------------------------------------------------------------------------------------------------------------------------------------------------------------|--|
| 0080 | <p><b>ETCH (DRIE) SILICON</b></p> <p>EQUIPMENT: STS HRM ICP (MARCUS INORGANIC CLEANROOM)</p> <p><b>RUN RECIPE 'HC_GENM' FOR 350 CYCLES. THIS SHOULD ETCH 400 <math>\mu\text{m}</math> OF Si.</b></p> <p>NOTES FOR STS HRM ICP:</p> <ul style="list-style-type: none"><li>• 'VENT' LOAD LOCK TO LOAD SAMPLE; LID WILL OPEN ONCE BY ITSELF</li><li>• PLACE SAMPLE ON SHUTTLE, CLOSE LID, AND PRESS 'PUMP &amp; MAP'</li><li>• SELECT WAFER POSITION (1 OR 2) AND PRESS 'LOAD' TO LOAD SAMPLE INTO ETCHING CHAMBER</li><li>• GO TO 'RECEIPE'<ul style="list-style-type: none"><li>○ OPEN AND EDIT THE RECIPE YOU WANT TO RUN.</li><li>○ IT IS OK TO OVERWRITE RECIPES</li><li>○ USE 'HC_GENM' RECIPE</li><li>○ WE WILL ONLY EDIT THE NUMBER OF CYCLES<ul style="list-style-type: none"><li>▪ 350 CYCLES <math>\approx</math> 400 <math>\mu\text{m}</math></li></ul></li><li>○ SAVE RECIPE AND CLOSE RECIPE EDITING WINDOW</li></ul></li><li>• PRESS 'SELECT' (NOT 'PROCESS')<ul style="list-style-type: none"><li>○ SELECT DESIRED RECIPE, LET IT LOAD. ONCE LOADED, PRESS 'PROCESS' TO BEGIN ETCH.</li></ul></li></ul> |  |
| 0090 | <p><b>SUBMIT WAFERS TO DICING SERVICE WITH CHARLIE SUH. &lt;suh@gatech.edu&gt;</b></p> <p>PLACE WAFERS IN STAFF ROOM CABINET LABELED 'DICING SAMPLES'</p> <p>BE SURE TO SUBMIT DICING INSTRUCTIONS TO ENSURE CORRECT DICING</p>                                                                                                                                                                                                                                                                                                                                                                                                                                                                                                                                                                                                                                                                                                                                                                                                                                                                                      |  |
| 0100 | <p><b>PEEL INDIVIDUAL DICED SUBSTRATES FROM DICING TAPE</b></p> <p>SUBSTRATES ARE VERY FRAGILE; USE CARE WHEN PEELING SUBSTRATES OFF OF DICING TAPE.</p> <p>USING ACETONE TO REMOVE ADHESIVE CAN HELP BUT CAUSES ADHESIVE LAYER TO COME OFF OF THE TAPE BACKING. CAN BE MESSY.</p>                                                                                                                                                                                                                                                                                                                                                                                                                                                                                                                                                                                                                                                                                                                                                                                                                                   |  |

|      |                                                                                                                                                                                                                                                                                                                                                                                                                                                                                                                                                                                                                                   |  |
|------|-----------------------------------------------------------------------------------------------------------------------------------------------------------------------------------------------------------------------------------------------------------------------------------------------------------------------------------------------------------------------------------------------------------------------------------------------------------------------------------------------------------------------------------------------------------------------------------------------------------------------------------|--|
| 0110 | <p><b>RINSE SUBSTRATES OFF WITH ACETONE THEN ISOPROPYL ALCOHOL AND THEN DI WATER</b></p> <p>BE SURE TO REMOVE ALL RESIDUAL PHOTORESIST PRIOR TO KOH ETCH.</p>                                                                                                                                                                                                                                                                                                                                                                                                                                                                     |  |
| 0120 | <p><b>LET SUBSTRATES AIR DRY THOROUGHLY</b></p> <p>SUBSTRATES CAN BE PLACED ON HOTPLATE TO ACCELERATE DRYING.</p>                                                                                                                                                                                                                                                                                                                                                                                                                                                                                                                 |  |
| 0130 | <p><b>KOH ETCH SILICON THRU TO SILICON NITRIDE AT 85°C FOR 1 HOUR OR UNTIL APERTURES ARE CLEAR.</b></p> <p>EQUIPMENT:           KOH 45% AQUEOUS SOLUTION<br/>                              TEFLON ETCHING FIXTURE</p> <p>DO NOT DILUTE KOH; IT SHOULD BE AT CORRECT CONCENTRATION.</p> <p>PLACE SUBSTRATES IN TEFLON ETCHING FIXTURE. EXPOSED SILICON SHOULD BE FACING UP TO ALLOW HYDROGEN BUBBLE TO FREELY PERCOLATE. FIXTURE HOLDS UP TO 9 SUBSTRATES</p> <p>PLACE FIXTURE WITH SUBSTRATES IN SHALLOW BEAKER AND FILL WITH KOH TO FULLY COVER FIXTURE</p> <p>DO NOT OVER ETCH SUBSTRATES. SILICON FRAME MAY TO DETERIORATE</p> |  |
